# Supplementary material for: Bidirectional Regulation of Urinary Stone Composition by Hypothyroidism: A Propensity Score-Matched Analysis of 33,579 Patients
Source: Research Square preprint supplement (doi:10.21203/rs.3.rs-7784983/v1), 2025-11-13
Supplement: Supplementary file 1 [file 76270d16bb911d0907caa1b7.docx]

**Supplementary Information**

**Bidirectional Regulation of Urinary Stone Composition by Hypothyroidism: A Propensity Score-Matched Analysis of 33,579 Patients**

**Mengting Wang1,2#, Zhenglin Chang1,2#,** **Yiping La****i1#,** **Haojie Wu1****,** **Ying Liang1*, Qianjun** **Li****1*, Baoqing Sun****1***

1 Department of Clinical Laboratory, National Center for Respiratory Medicine, National Clinical Research Center for Respiratory Disease, State Key Laboratory of Respiratory Disease, Guangzhou Institute of Respiratory Health, The First Affiliated Hospital of Guangzhou Medical University, Guangzhou, Guangdong 510120, China.

2 Department of Urology and Guangdong Key Laboratory of Urology, The First Affiliated Hospital of Guangzhou Medical University, Guangzhou, China.

*Address correspondence to:

Baoqing Sun: [sunbaoqing@vip.163.com](mailto:sunbaoqing@vip.163.com)

Guohua Zeng: 2008690094@gzhmu.edu.cn

Qianjun Li: liqianjun2123@163.com

Ying Liang: [wingleung113@126.com](mailto:wingleung113@126.com)

**Table S1. Baseline Characteristics of the Original Cohort with HT**

| **Variable** | **level** | **Overall** | **No HT- stone formers** | **HT- stone formers** | **p** |
| --- | --- | --- | --- | --- | --- |
| n |  | 33579 | 33430 | 149 |  |
| Year | 2014 | 2266 (6.7) | 2257 (6.8) | 9 (6.0) | 0.132 |
|  | 2015 | 2659 (7.9) | 2652 (7.9) | 7 (4.7) |  |
|  | 2016 | 2824 (8.4) | 2817 (8.4) | 7 (4.7) |  |
|  | 2017 | 2998 (8.9) | 2988 (8.9) | 10 (6.7) |  |
|  | 2018 | 3056 (9.1) | 3039 (9.1) | 17 (11.4) |  |
|  | 2019 | 3417 (10.2) | 3403 (10.2) | 14 (9.4) |  |
|  | 2020 | 2552 (7.6) | 2535 (7.6) | 17 (11.4) |  |
|  | 2021 | 2755 (8.2) | 2748 (8.2) | 7 (4.7) |  |
|  | 2022 | 2665 (7.9) | 2648 (7.9) | 17 (11.4) |  |
|  | 2023 | 4044 (12.0) | 4022 (12.0) | 22 (14.8) |  |
|  | 2024 | 4343 (12.9) | 4321 (12.9) | 22 (14.8) |  |
| Month mean SD |  | 6.99 (3.20) | 6.99 (3.20) | 7.26 (3.32) | 0.308 |
| Season | Fall | 8787 (26.2) | 8751 (26.2) | 36 (24.2) | 0.712 |
|  | Spring | 8298 (24.7) | 8263 (24.7) | 35 (23.5) |  |
|  | Summer | 10266 (30.6) | 10221 (30.6) | 45 (30.2) |  |
|  | Winter | 6228 (18.5) | 6195 (18.5) | 33 (22.1) |  |
| PATIENTSEX | Female | 13691 (40.8) | 13599 (40.7) | 92 (61.7) | <0.001 |
|  | Male | 19888 (59.2) | 19831 (59.3) | 57 (38.3) |  |
| PATIENTAGE mean SD |  | 51.58 (13.59) | 51.57 (13.60) | 52.75 (11.10) | 0.290 |
| AgeGroup | High age (>60) | 9849 (29.3) | 9810 (29.3) | 39 (26.2) | 0.164 |
|  | Middle age (40-60) | 17315 (51.6) | 17227 (51.5) | 88 (59.1) |  |
|  | Young age (<40) | 6415 (19.1) | 6393 (19.1) | 22 (14.8) |  |
| Stone location mean SD |  | 1.31 (0.55) | 1.31 (0.55) | 1.28 (0.52) | 0.515 |
| Infection stones_MC | WHT | 25 (0.4) | 25 (0.4) | 0 (0.0) | 0.987 |
|  | COD | 15 (0.2) | 15 (0.2) | 0 (0.0) |  |
|  | CaP | 20 (0.3) | 20 (0.3) | 0 (0.0) |  |
|  | MAP | 1118 (16.8) | 1111 (16.8) | 7 (20.6) |  |
|  | CaHPO4 | 78 (1.2) | 78 (1.2) | 0 (0.0) |  |
|  | UA | 7 (0.1) | 7 (0.1) | 0 (0.0) |  |
|  | AU | 13 (0.2) | 13 (0.2) | 0 (0.0) |  |
|  | CaP(CO3) | 499 (7.5) | 495 (7.5) | 4 (11.8) |  |
|  | CA | 4817 (72.6) | 4794 (72.6) | 23 (67.6) |  |
|  | COM | 44 (0.7) | 44 (0.7) | 0 (0.0) |  |
| Infection stones_SC1 | WHT | 227 (3.5) | 226 (3.5) | 1 (2.9) | 0.868 |
|  | Others | 1 (0.0) | 1 (0.0) | 0 (0.0) |  |
|  | COD | 936 (14.4) | 934 (14.5) | 2 (5.9) |  |
|  | Cys | 3 (0.0) | 3 (0.0) | 0 (0.0) |  |
|  | CaP | 126 (1.9) | 126 (2.0) | 0 (0.0) |  |
|  | MAP | 1233 (19.0) | 1226 (19.0) | 7 (20.6) |  |
|  | CaHPO4 | 20 (0.3) | 20 (0.3) | 0 (0.0) |  |
|  | UA | 17 (0.3) | 17 (0.3) | 0 (0.0) |  |
|  | AU | 72 (1.1) | 72 (1.1) | 0 (0.0) |  |
|  | NaU | 8 (0.1) | 8 (0.1) | 0 (0.0) |  |
|  | CaP(CO3) | 821 (12.6) | 819 (12.7) | 2 (5.9) |  |
|  | CA | 1048 (16.1) | 1041 (16.1) | 7 (20.6) |  |
|  | COM | 1979 (30.5) | 1964 (30.4) | 15 (44.1) |  |
| Infection stones_SC2 | WHT | 276 (6.0) | 276 (6.0) | 0 (0.0) | 0.569 |
|  | COD | 863 (18.8) | 859 (18.8) | 4 (19.0) |  |
|  | CaP | 215 (4.7) | 213 (4.7) | 2 (9.5) |  |
|  | MAP | 799 (17.4) | 795 (17.4) | 4 (19.0) |  |
|  | CaHPO4 | 13 (0.3) | 13 (0.3) | 0 (0.0) |  |
|  | UA | 15 (0.3) | 15 (0.3) | 0 (0.0) |  |
|  | AU | 97 (2.1) | 97 (2.1) | 0 (0.0) |  |
|  | NaU | 3 (0.1) | 3 (0.1) | 0 (0.0) |  |
|  | CaP(CO3) | 984 (21.4) | 977 (21.4) | 7 (33.3) |  |
|  | CA | 250 (5.4) | 247 (5.4) | 3 (14.3) |  |
|  | COM | 1074 (23.4) | 1073 (23.5) | 1 (4.8) |  |
|  | Others | 6(0.1) | 6(0.1) | 0 (0.0) |  |
| Calcium-containing stones_MC | WHT | 6 (0.0) | 6 (0.0) | 0 (0.0) | 1.000 |
|  | COD | 3113 (13.9) | 3099 (13.9) | 14 (15.1) |  |
|  | Cys | 1 (0.0) | 1 (0.0) | 0 (0.0) |  |
|  | CaP | 18 (0.1) | 18 (0.1) | 0 (0.0) |  |
|  | MAP | 4 (0.0) | 4 (0.0) | 0 (0.0) |  |
|  | CaHPO4 | 140 (0.6) | 140 (0.6) | 0 (0.0) |  |
|  | UA | 7 (0.0) | 7 (0.0) | 0 (0.0) |  |
|  | AU | 11 (0.0) | 11 (0.0) | 0 (0.0) |  |
|  | NaU | 5 (0.0) | 5 (0.0) | 0 (0.0) |  |
|  | CaP(CO3) | 135 (0.6) | 135 (0.6) | 0 (0.0) |  |
|  | CC | 1 (0.0) | 1 (0.0) | 0 (0.0) |  |
|  | CA | 684 (3.1) | 683 (3.1) | 1 (1.1) |  |
|  | COM | 18186 (81.5) | 18108 (81.5) | 78 (83.9) |  |
|  | CHPM | 1 (0.0) | 1 (0.0) | 0 (0.0) |  |
|  | Others | 12(0.0) | 12(0.0) | 0 (0.0) |  |
| Calcium-containing stones_SC1 | L-Cys | 1 (0.0) | 1 (0.0) | 0 (0.0) | 0.985 |
|  | WHT | 18 (0.1) | 18 (0.1) | 0 (0.0) |  |
|  | COD | 10974 (61.8) | 10934 (61.8) | 40 (62.5) |  |
|  | Cys | 1 (0.0) | 1 (0.0) | 0 (0.0) |  |
|  | CaP | 107 (0.6) | 107 (0.6) | 0 (0.0) |  |
|  | MAP | 11 (0.1) | 11 (0.1) | 0 (0.0) |  |
|  | CaHPO4 | 28 (0.2) | 28 (0.2) | 0 (0.0) |  |
|  | UA | 704 (4.0) | 699 (3.9) | 5 (7.8) |  |
|  | AU | 69 (0.4) | 68 (0.4) | 1 (1.6) |  |
|  | NaU | 39 (0.2) | 39 (0.2) | 0 (0.0) |  |
|  | CaP(CO3) | 127 (0.7) | 127 (0.7) | 0 (0.0) |  |
|  | CA | 2803 (15.8) | 2796 (15.8) | 7 (10.9) |  |
|  | COM | 2875 (16.2) | 2864 (16.2) | 11 (17.2) |  |
|  | Others | 11 (0.0) | 11 (0.0) | 0(0.0) |  |
| Calcium-containing stones_SC2 | WHT | 27 (0.6) | 26 (0.6) | 1 (7.7) | 0.439 |
|  | COD | 1428 (31.5) | 1426 (31.5) | 2 (15.4) |  |
|  | Cys | 1 (0.0) | 1 (0.0) | 0 (0.0) |  |
|  | CaP | 37 (0.8) | 37 (0.8) | 0 (0.0) |  |
|  | MAP | 8 (0.2) | 8 (0.2) | 0 (0.0) |  |
|  | CaHPO4 | 15 (0.3) | 15 (0.3) | 0 (0.0) |  |
|  | UA | 216 (4.8) | 215 (4.8) | 1 (7.7) |  |
|  | AU | 62 (1.4) | 62 (1.4) | 0 (0.0) |  |
|  | NaU | 38 (0.8) | 38 (0.8) | 0 (0.0) |  |
|  | CaP(CO3) | 190 (4.2) | 189 (4.2) | 1 (7.7) |  |
|  | CA | 1615 (35.6) | 1611 (35.6) | 4 (30.8) |  |
|  | COM | 885 (19.5) | 881 (19.5) | 4 (30.8) |  |
|  | Others | 11(0.2) | 11(0.2) | 0(0.0) |  |
|  | UA | 4205 (95.4) | 4183 (95.4) | 22 (100.0) |  |
|  | AU | 61 (1.4) | 61 (1.4) | 0 (0.0) |  |
|  | NaU | 86 (2.0) | 86 (2.0) | 0 (0.0) |  |
|  | CaP(CO3) | 3 (0.1) | 3 (0.1) | 0 (0.0) |  |
|  | CA | 5 (0.1) | 5 (0.1) | 0 (0.0) |  |
|  | COM | 8 (0.2) | 8 (0.2) | 0 (0.0) |  |
|  | Others | 39(0.8) | 39(0.8) | 0 (0.0) |  |
| Uric acid stones_SC1 | WHT | 16 (0.4) | 16 (0.4) | 0 (0.0) | 0.996 |
|  | COD | 49 (1.3) | 49 (1.4) | 0 (0.0) |  |
|  | CaP | 33 (0.9) | 33 (0.9) | 0 (0.0) |  |
|  | MAP | 83 (2.3) | 83 (2.3) | 0 (0.0) |  |
|  | UA | 56 (1.5) | 56 (1.6) | 0 (0.0) |  |
|  | AU | 78 (2.1) | 78 (2.2) | 0 (0.0) |  |
|  | NaU | 57 (1.6) | 57 (1.6) | 0 (0.0) |  |
|  | CaP(CO3) | 9 (0.2) | 9 (0.2) | 0 (0.0) |  |
|  | CA | 16 (0.4) | 16 (0.4) | 0 (0.0) |  |
|  | COM | 1391 (38.3) | 1382 (38.3) | 9 (47.4) |  |
|  | Others | 1842(50.7) | 1832(50.7) | 10(52.6) |  |
| Uric acid stones_SC2 | WHT | 19 (11.1) | 19 (11.1) | 0 (NaN) | NaN |
|  | COD | 14 (8.2) | 14 (8.2) | 0 (NaN) |  |
|  | Cys | 1 (0.6) | 1 (0.6) | 0 (NaN) |  |
|  | CaP | 5 (2.9) | 5 (2.9) | 0 (NaN) |  |
|  | MAP | 1 (0.6) | 1 (0.6) | 0 (NaN) |  |
|  | UA | 14 (8.2) | 14 (8.2) | 0 (NaN) |  |
|  | AU | 21 (12.3) | 21 (12.3) | 0 (NaN) |  |
|  | NaU | 7 (4.1) | 7 (4.1) | 0 (NaN) |  |
|  | CaP(CO3) | 6 (3.5) | 6 (3.5) | 0 (NaN) |  |
|  | CA | 12 (7.0) | 12 (7.0) | 0 (NaN) |  |
|  | COM | 51 (29.8) | 51 (29.8) | 0 (NaN) |  |
|  | Others | 20(11.7) | 20(11.7) | 0 (NaN) |  |

**Table S2. Baseline Characteristics of the Original Cohort with HT-**

| **Variable** | **level** | **Overall** | **No HT- stone formers** | **HT- stone formers** | **p** |
| --- | --- | --- | --- | --- | --- |
| n |  | 33579 | 33509 | 70 |  |
| Year | 2014 | 2266 (6.7) | 2262 (6.8) | 4 (5.7) | 0.001 |
|  | 2015 | 2659 (7.9) | 2657 (7.9) | 2 (2.9) |  |
|  | 2016 | 2824 (8.4) | 2822 (8.4) | 2 (2.9) |  |
|  | 2017 | 2998 (8.9) | 2995 (8.9) | 3 (4.3) |  |
|  | 2018 | 3056 (9.1) | 3051 (9.1) | 5 (7.1) |  |
|  | 2019 | 3417 (10.2) | 3411 (10.2) | 6 (8.6) |  |
|  | 2020 | 2552 (7.6) | 2549 (7.6) | 3 (4.3) |  |
|  | 2021 | 2755 (8.2) | 2752 (8.2) | 3 (4.3) |  |
|  | 2022 | 2665 (7.9) | 2654 (7.9) | 11 (15.7) |  |
|  | 2023 | 4044 (12.0) | 4024 (12.0) | 20 (28.6) |  |
|  | 2024 | 4343 (12.9) | 4332 (12.9) | 11 (15.7) |  |
| Month mean SD |  | 6.99 (3.20) | 6.99 (3.20) | 6.90 (2.94) | 0.805 |
| Season | Fall | 8787 (26.2) | 8765 (26.2) | 22 (31.4) | 0.214 |
|  | Spring | 8298 (24.7) | 8276 (24.7) | 22 (31.4) |  |
|  | Summer | 10266 (30.6) | 10248 (30.6) | 18 (25.7) |  |
|  | Winter | 6228 (18.5) | 6220 (18.6) | 8 (11.4) |  |
| PATIENTSEX | Female | 13691 (40.8) | 13632 (40.7) | 59 (84.3) | <0.001 |
|  | Male | 19888 (59.2) | 19877 (59.3) | 11 (15.7) |  |
| PATIENTAGE mean SD |  | 51.58 (13.59) | 51.57 (13.59) | 54.60 (13.29) | 0.062 |
| AgeGroup | High age (>60) | 9849 (29.3) | 9825 (29.3) | 24 (34.3) | 0.039 |
|  | Middle age (40-60) | 17315 (51.6) | 17274 (51.6) | 41 (58.6) |  |
|  | Young age (<40) | 6415 (19.1) | 6410 (19.1) | 5 (7.1) |  |
| Stone location mean SD |  | 1.31 (0.55) | 1.31 (0.55) | 1.23 (0.42) | 0.208 |
| Infection stones_MC | WHT | 25 (0.4) | 25 (0.4) | 0 (0.0) | 0.940 |
|  | COD | 15 (0.2) | 15 (0.2) | 0 (0.0) |  |
|  | CaP | 20 (0.3) | 20 (0.3) | 0 (0.0) |  |
|  | MAP | 1118 (16.8) | 1114 (16.9) | 4 (14.8) |  |
|  | CaHPO4 | 78 (1.2) | 78 (1.2) | 0 (0.0) |  |
|  | UA | 7 (0.1) | 7 (0.1) | 0 (0.0) |  |
|  | AU | 13 (0.2) | 13 (0.2) | 0 (0.0) |  |
|  | CaP(CO3) | 499 (7.5) | 499 (7.6) | 0 (0.0) |  |
|  | CA | 4817 (72.6) | 4794 (72.5) | 23 (85.2) |  |
|  | COM | 44 (0.7) | 44 (0.7) | 0 (0.0) |  |
| Infection stones_SC1 | WHT | 227 (3.5) | 226 (3.5) | 1 (4.0) | 0.823 |
|  | Others | 1 (0.0) | 1 (0.0) | 0 (0.0) |  |
|  | COD | 936 (14.4) | 936 (14.5) | 0 (0.0) |  |
|  | Cys | 3 (0.0) | 3 (0.0) | 0 (0.0) |  |
|  | CaP | 126 (1.9) | 126 (1.9) | 0 (0.0) |  |
|  | MAP | 1233 (19.0) | 1227 (19.0) | 6 (24.0) |  |
|  | CaHPO4 | 20 (0.3) | 20 (0.3) | 0 (0.0) |  |
|  | UA | 17 (0.3) | 17 (0.3) | 0 (0.0) |  |
|  | AU | 72 (1.1) | 72 (1.1) | 0 (0.0) |  |
|  | NaU | 8 (0.1) | 8 (0.1) | 0 (0.0) |  |
|  | CaP(CO3) | 821 (12.6) | 815 (12.6) | 6 (24.0) |  |
|  | CA | 1048 (16.1) | 1044 (16.1) | 4 (16.0) |  |
|  | COM | 1979 (30.5) | 1971 (30.5) | 8 (32.0) |  |
| Infection stones_SC2 | WHT | 276 (6.0) | 274 (6.0) | 2 (16.7) | 0.979 |
|  | COD | 863 (18.8) | 860 (18.8) | 3 (25.0) |  |
|  | CaP | 215 (4.7) | 215 (4.7) | 0 (0.0) |  |
|  | MAP | 799 (17.4) | 797 (17.4) | 2 (16.7) |  |
|  | CaHPO4 | 13 (0.3) | 13 (0.3) | 0 (0.0) |  |
|  | UA | 15 (0.3) | 15 (0.3) | 0 (0.0) |  |
|  | AU | 97 (2.1) | 97 (2.1) | 0 (0.0) |  |
|  | NaU | 3 (0.1) | 3 (0.1) | 0 (0.0) |  |
|  | CaP(CO3) | 984 (21.4) | 982 (21.4) | 2 (16.7) |  |
|  | CA | 250 (5.4) | 250 (5.5) | 0 (0.0) |  |
|  | COM | 1074 (23.4) | 1071 (23.4) | 3 (25.0) |  |
|  | Others | 6(0.1) | 6(0.1) | 0 (0.0) |  |
| Calcium-containing stones_MC | WHT | 6 (0.0) | 6 (0.0) | 0 (0.0) | 1.000 |
|  | COD | 3113 (13.9) | 3107 (13.9) | 6 (19.4) |  |
|  | Cys | 1 (0.0) | 1 (0.0) | 0 (0.0) |  |
|  | CaP | 18 (0.1) | 18 (0.1) | 0 (0.0) |  |
|  | MAP | 4 (0.0) | 4 (0.0) | 0 (0.0) |  |
|  | CaHPO4 | 140 (0.6) | 140 (0.6) | 0 (0.0) |  |
|  | UA | 7 (0.0) | 7 (0.0) | 0 (0.0) |  |
|  | AU | 11 (0.0) | 11 (0.0) | 0 (0.0) |  |
|  | NaU | 5 (0.0) | 5 (0.0) | 0 (0.0) |  |
|  | CaP(CO3) | 135 (0.6) | 135 (0.6) | 0 (0.0) |  |
|  | CC | 1 (0.0) | 1 (0.0) | 0 (0.0) |  |
|  | CA | 684 (3.1) | 681 (3.1) | 3 (9.7) |  |
|  | COM | 18186 (81.5) | 18164 (81.5) | 22 (71.0) |  |
|  | CHPM | 1 (0.0) | 1 (0.0) | 0 (0.0) |  |
|  | Others | 12(0.0) | 12(0.0) | 0 (0.0) |  |
| Calcium-containing stones_SC1 | L-Cys | 1 (0.0) | 1 (0.0) | 0 (0.0) | 0.992 |
|  | WHT | 18 (0.1) | 18 (0.1) | 0 (0.0) |  |
|  | COD | 10974 (61.8) | 10962 (61.8) | 12 (48.0) |  |
|  | Cys | 1 (0.0) | 1 (0.0) | 0 (0.0) |  |
|  | CaP | 107 (0.6) | 107 (0.6) | 0 (0.0) |  |
|  | MAP | 11 (0.1) | 11 (0.1) | 0 (0.0) |  |
|  | CaHPO4 | 28 (0.2) | 28 (0.2) | 0 (0.0) |  |
|  | UA | 704 (4.0) | 703 (4.0) | 1 (4.0) |  |
|  | AU | 69 (0.4) | 69 (0.4) | 0 (0.0) |  |
|  | NaU | 39 (0.2) | 39 (0.2) | 0 (0.0) |  |
|  | CaP(CO3) | 127 (0.7) | 126 (0.7) | 1 (4.0) |  |
|  | CA | 2803 (15.8) | 2798 (15.8) | 5 (20.0) |  |
|  | COM | 2875 (16.2) | 2869 (16.2) | 6 (24.0) |  |
|  | CDPM | 5 (0.0) | 5 (0.0) | 0 (0.0) |  |
|  | Others | 6 (0.0) | 6 (0.0) | 0 (0.0) |  |
| Calcium-containing stones_SC2 | WHT | 27 (0.6) | 27 (0.6) | 0 (0.0) | 0.955 |
|  | COD | 1428 (31.5) | 1426 (31.5) | 2 (40.0) |  |
|  | Cys | 1 (0.0) | 1 (0.0) | 0 (0.0) |  |
|  | CaP | 37 (0.8) | 37 (0.8) | 0 (0.0) |  |
|  | MAP | 8 (0.2) | 8 (0.2) | 0 (0.0) |  |
|  | CaHPO4 | 15 (0.3) | 15 (0.3) | 0 (0.0) |  |
|  | UA | 216 (4.8) | 216 (4.8) | 0 (0.0) |  |
|  | AU | 62 (1.4) | 62 (1.4) | 0 (0.0) |  |
|  | NaU | 38 (0.8) | 38 (0.8) | 0 (0.0) |  |
|  | CaP(CO3) | 190 (4.2) | 189 (4.2) | 1 (20.0) |  |
|  | CA | 1615 (35.6) | 1615 (35.7) | 0 (0.0) |  |
|  | COM | 885 (19.5) | 883 (19.5) | 2 (40.0) |  |
|  | Others | 9(0.2) | 9(0.2) | 0 (0.0) |  |
|  | UA | 4205 (95.4) | 4193 (95.4) | 12 (100.0) |  |
|  | AU | 61 (1.4) | 61 (1.4) | 0 (0.0) |  |
|  | NaU | 86 (2.0) | 86 (2.0) | 0 (0.0) |  |
|  | CaP(CO3) | 3 (0.1) | 3 (0.1) | 0 (0.0) |  |
|  | CA | 5 (0.1) | 5 (0.1) | 0 (0.0) |  |
|  | COM | 8 (0.2) | 8 (0.2) | 0 (0.0) |  |
|  | Others | 39(0.8) | 39(0.8) | 0 (0.0) |  |
| Uric acid stones_SC1 | WHT | 16 (0.4) | 16 (0.4) | 0 (0.0) | 0.809 |
|  | COD | 49 (1.3) | 48 (1.3) | 1 (10.0) |  |
|  | CaP | 33 (0.9) | 33 (0.9) | 0 (0.0) |  |
|  | MAP | 83 (2.3) | 83 (2.3) | 0 (0.0) |  |
|  | UA | 56 (1.5) | 56 (1.5) | 0 (0.0) |  |
|  | AU | 78 (2.1) | 78 (2.2) | 0 (0.0) |  |
|  | NaU | 57 (1.6) | 57 (1.6) | 0 (0.0) |  |
|  | CaP(CO3) | 9 (0.2) | 9 (0.2) | 0 (0.0) |  |
|  | CA | 16 (0.4) | 16 (0.4) | 0 (0.0) |  |
|  | COM | 1391 (38.3) | 1388 (38.3) | 3 (30.0) |  |
|  | Others | 1842(50.7) | 1836(50.7) | 6(60.0) |  |
| Uric acid stones_SC2 | WHT | 19 (11.1) | 19 (11.2) | 0 (0.0) | 0.999 |
|  | COD | 14 (8.2) | 14 (8.2) | 0 (0.0) |  |
|  | Cys | 1 (0.6) | 1 (0.6) | 0 (0.0) |  |
|  | CaP | 5 (2.9) | 5 (2.9) | 0 (0.0) |  |
|  | MAP | 1 (0.6) | 1 (0.6) | 0 (0.0) |  |
|  | UA | 14 (8.2) | 14 (8.2) | 0 (0.0) |  |
|  | AU | 21 (12.3) | 21 (12.4) | 0 (0.0) |  |
|  | NaU | 7 (4.1) | 7 (4.1) | 0 (0.0) |  |
|  | CaP(CO3) | 6 (3.5) | 6 (3.5) | 0 (0.0) |  |
|  | CA | 12 (7.0) | 12 (7.1) | 0 (0.0) |  |
|  | COM | 51 (29.8) | 50 (29.4) | 1 (100.0) |  |
|  | Others | 20(11.7) | 20(11.8) | 0 (0.0) |  |

**Table S3. Baseline Characteristics of the Original Cohort with HPT**

| **Variable** | **level** | **Overall** | **No HPT stone formers** | **HPT stone formers** | **p** |
| --- | --- | --- | --- | --- | --- |
| n |  | 33579 | 33538 | 41 |  |
| Year | 2014 | 2266 (6.7) | 2265 (6.8) | 1 (2.4) | 0.011 |
|  | 2015 | 2659 (7.9) | 2658 (7.9) | 1 (2.4) |  |
|  | 2016 | 2824 (8.4) | 2823 (8.4) | 1 (2.4) |  |
|  | 2017 | 2998 (8.9) | 2998 (8.9) | 0 (0.0) |  |
|  | 2018 | 3056 (9.1) | 3056 (9.1) | 0 (0.0) |  |
|  | 2019 | 3417 (10.2) | 3410 (10.2) | 7 (17.1) |  |
|  | 2020 | 2552 (7.6) | 2545 (7.6) | 7 (17.1) |  |
|  | 2021 | 2755 (8.2) | 2750 (8.2) | 5 (12.2) |  |
|  | 2022 | 2665 (7.9) | 2660 (7.9) | 5 (12.2) |  |
|  | 2023 | 4044 (12.0) | 4039 (12.0) | 5 (12.2) |  |
|  | 2024 | 4343 (12.9) | 4334 (12.9) | 9 (22.0) |  |
| Month mean SD |  | 6.99 (3.20) | 7.00 (3.20) | 6.20 (2.93) | 0.110 |
| Season | Fall | 8787 (26.2) | 8776 (26.2) | 11 (26.8) | 0.061 |
|  | Spring | 8298 (24.7) | 8281 (24.7) | 17 (41.5) |  |
|  | Summer | 10266 (30.6) | 10257 (30.6) | 9 (22.0) |  |
|  | Winter | 6228 (18.5) | 6224 (18.6) | 4 (9.8) |  |
| PATIENTSEX | Female | 13691 (40.8) | 13670 (40.8) | 21 (51.2) | 0.229 |
|  | Male | 19888 (59.2) | 19868 (59.2) | 20 (48.8) |  |
| PATIENTAGE mean SD |  | 51.58 (13.59) | 51.57 (13.59) | 54.15 (14.49) | 0.225 |
| AgeGroup | High age (>60) | 9849 (29.3) | 9834 (29.3) | 15 (36.6) | 0.594 |
|  | Middle age (40-60) | 17315 (51.6) | 17296 (51.6) | 19 (46.3) |  |
|  | Young age (<40) | 6415 (19.1) | 6408 (19.1) | 7 (17.1) |  |
| Stone location mean SD |  | 1.31 (0.55) | 1.31 (0.55) | 1.32 (0.52) | 0.944 |
| Infection stones_MC | WHT | 25 (0.4) | 25 (0.4) | 0 (0.0) | 0.999 |
|  | COD | 15 (0.2) | 15 (0.2) | 0 (0.0) |  |
|  | CaP | 20 (0.3) | 20 (0.3) | 0 (0.0) |  |
|  | MAP | 1118 (16.8) | 1116 (16.9) | 2 (11.8) |  |
|  | CaHPO4 | 78 (1.2) | 78 (1.2) | 0 (0.0) |  |
|  | UA | 7 (0.1) | 7 (0.1) | 0 (0.0) |  |
|  | AU | 13 (0.2) | 13 (0.2) | 0 (0.0) |  |
|  | CaP(CO3) | 499 (7.5) | 497 (7.5) | 2 (11.8) |  |
|  | CA | 4817 (72.6) | 4804 (72.6) | 13 (76.5) |  |
|  | COM | 44 (0.7) | 44 (0.7) | 0 (0.0) |  |
| Infection stones_SC1 | WHT | 227 (3.5) | 225 (3.5) | 2 (11.8) | 0.973 |
|  | Others | 1 (0.0) | 1 (0.0) | 0 (0.0) |  |
|  | COD | 936 (14.4) | 934 (14.4) | 2 (11.8) |  |
|  | Cys | 3 (0.0) | 3 (0.0) | 0 (0.0) |  |
|  | CaP | 126 (1.9) | 126 (1.9) | 0 (0.0) |  |
|  | MAP | 1233 (19.0) | 1229 (19.0) | 4 (23.5) |  |
|  | CaHPO4 | 20 (0.3) | 20 (0.3) | 0 (0.0) |  |
|  | UA | 17 (0.3) | 17 (0.3) | 0 (0.0) |  |
|  | AU | 72 (1.1) | 72 (1.1) | 0 (0.0) |  |
|  | NaU | 8 (0.1) | 8 (0.1) | 0 (0.0) |  |
|  | CaP(CO3) | 821 (12.6) | 819 (12.7) | 2 (11.8) |  |
|  | CA | 1048 (16.1) | 1046 (16.2) | 2 (11.8) |  |
|  | COM | 1979 (30.5) | 1974 (30.5) | 5 (29.4) |  |
| Infection stones_SC2 | WHT | 276 (6.0) | 274 (6.0) | 2 (14.3) | 0.955 |
|  | COD | 863 (18.8) | 861 (18.8) | 2 (14.3) |  |
|  | CaP | 215 (4.7) | 215 (4.7) | 0 (0.0) |  |
|  | MAP | 799 (17.4) | 795 (17.4) | 4 (28.6) |  |
|  | CaHPO4 | 13 (0.3) | 13 (0.3) | 0 (0.0) |  |
|  | UA | 15 (0.3) | 15 (0.3) | 0 (0.0) |  |
|  | AU | 97 (2.1) | 97 (2.1) | 0 (0.0) |  |
|  | NaU | 3 (0.1) | 3 (0.1) | 0 (0.0) |  |
|  | CaP(CO3) | 984 (21.4) | 982 (21.4) | 2 (14.3) |  |
|  | CA | 250 (5.4) | 250 (5.5) | 0 (0.0) |  |
|  | COM | 1074 (23.4) | 1070 (23.4) | 4 (28.6) |  |
|  | Others | 6(0.1) | 6(0.1) | 0 (0.0) |  |
| Calcium-containing stones_MC | WHT | 6 (0.0) | 6 (0.0) | 0 (0.0) | 1.000 |
|  | COD | 3113 (13.9) | 3109 (13.9) | 4 (17.4) |  |
|  | Cys | 1 (0.0) | 1 (0.0) | 0 (0.0) |  |
|  | CaP | 18 (0.1) | 18 (0.1) | 0 (0.0) |  |
|  | MAP | 4 (0.0) | 4 (0.0) | 0 (0.0) |  |
|  | CaHPO4 | 140 (0.6) | 140 (0.6) | 0 (0.0) |  |
|  | UA | 7 (0.0) | 7 (0.0) | 0 (0.0) |  |
|  | AU | 11 (0.0) | 11 (0.0) | 0 (0.0) |  |
|  | NaU | 5 (0.0) | 5 (0.0) | 0 (0.0) |  |
|  | CaP(CO3) | 135 (0.6) | 135 (0.6) | 0 (0.0) |  |
|  | CC | 1 (0.0) | 1 (0.0) | 0 (0.0) |  |
|  | CA | 684 (3.1) | 684 (3.1) | 0 (0.0) |  |
|  | COM | 18186 (81.5) | 18167 (81.5) | 19 (82.6) |  |
|  | CHPM | 1 (0.0) | 1 (0.0) | 0 (0.0) |  |
|  | Others | 12(0.0) | 12(0.0) | 0(0.0) |  |
| Calcium-containing stones_SC1 | L-Cys | 1 (0.0) | 1 (0.0) | 0 (0.0) | 0.372 |
|  | WHT | 18 (0.1) | 18 (0.1) | 0 (0.0) |  |
|  | COD | 10974 (61.8) | 10960 (61.8) | 14 (70.0) |  |
|  | Cys | 1 (0.0) | 1 (0.0) | 0 (0.0) |  |
|  | CaP | 107 (0.6) | 107 (0.6) | 0 (0.0) |  |
|  | MAP | 11 (0.1) | 11 (0.1) | 0 (0.0) |  |
|  | CaHPO4 | 28 (0.2) | 28 (0.2) | 0 (0.0) |  |
|  | UA | 704 (4.0) | 704 (4.0) | 0 (0.0) |  |
|  | AU | 69 (0.4) | 68 (0.4) | 1 (5.0) |  |
|  | NaU | 39 (0.2) | 39 (0.2) | 0 (0.0) |  |
|  | CaP(CO3) | 127 (0.7) | 126 (0.7) | 1 (5.0) |  |
|  | CA | 2803 (15.8) | 2801 (15.8) | 2 (10.0) |  |
|  | COM | 2875 (16.2) | 2873 (16.2) | 2 (10.0) |  |
|  | CDPM | 5 (0.0) | 5 (0.0) | 0 (0.0) |  |
|  | Others | 6(0.0) | 6(0.0) | 0 (0.0) |  |
| Calcium-containing stones_SC2 | WHT | 27 (0.6) | 27 (0.6) | 0 (0.0) | 0.977 |
|  | COD | 1428 (31.5) | 1428 (31.5) | 0 (0.0) |  |
|  | Cys | 1 (0.0) | 1 (0.0) | 0 (0.0) |  |
|  | CaP | 37 (0.8) | 37 (0.8) | 0 (0.0) |  |
|  | MAP | 8 (0.2) | 8 (0.2) | 0 (0.0) |  |
|  | CaHPO4 | 15 (0.3) | 15 (0.3) | 0 (0.0) |  |
|  | UA | 216 (4.8) | 215 (4.7) | 1 (20.0) |  |
|  | AU | 62 (1.4) | 62 (1.4) | 0 (0.0) |  |
|  | NaU | 38 (0.8) | 38 (0.8) | 0 (0.0) |  |
|  | CaP(CO3) | 190 (4.2) | 190 (4.2) | 0 (0.0) |  |
|  | CA | 1615 (35.6) | 1613 (35.6) | 2 (40.0) |  |
|  | COM | 885 (19.5) | 883 (19.5) | 2 (40.0) |  |
|  | Others | 11(0.2) | 11(0.2) | 0 (0.0) |  |
| Uric acid stones_MC | UA | 4205 (95.4) | 4204 (95.4) | 1 (100.0) |  |
|  | AU | 61 (1.4) | 61 (1.4) | 0 (0.0) |  |
|  | NaU | 86 (2.0) | 86 (2.0) | 0 (0.0) |  |
|  | CaP(CO3) | 3 (0.1) | 3 (0.1) | 0 (0.0) |  |
|  | CA | 5 (0.1) | 5 (0.1) | 0 (0.0) |  |
|  | COM | 8 (0.2) | 8 (0.2) | 0 (0.0) |  |
|  | Others | 37(0.8) | 37(0.8) | 0 (0.0) |  |
| Uric acid stones_SC1 | WHT | 16 (0.4) | 16 (0.4) | 0 (0.0) | <0.001 |
|  | COD | 49 (1.3) | 49 (1.4) | 0 (0.0) |  |
|  | CaP | 33 (0.9) | 32 (0.9) | 1 (100.0) |  |
|  | MAP | 83 (2.3) | 83 (2.3) | 0 (0.0) |  |
|  | UA | 56 (1.5) | 56 (1.5) | 0 (0.0) |  |
|  | AU | 78 (2.1) | 78 (2.1) | 0 (0.0) |  |
|  | NaU | 57 (1.6) | 57 (1.6) | 0 (0.0) |  |
|  | CaP(CO3) | 9 (0.2) | 9 (0.2) | 0 (0.0) |  |
|  | CA | 16 (0.4) | 16 (0.4) | 0 (0.0) |  |
|  | COM | 1391 (38.3) | 1391 (38.3) | 0 (0.0) |  |
|  | Others | 1841(50.7) | 1841(50.7) | 0 (0.0) |  |
| Uric acid stones_SC2 | WHT | 19 (11.1) | 19 (11.1) | 0 (NaN) | NaN |
|  | COD | 14 (8.2) | 14 (8.2) | 0 (NaN) |  |
|  | Cys | 1 (0.6) | 1 (0.6) | 0 (NaN) |  |
|  | CaP | 5 (2.9) | 5 (2.9) | 0 (NaN) |  |
|  | MAP | 1 (0.6) | 1 (0.6) | 0 (NaN) |  |
|  | UA | 14 (8.2) | 14 (8.2) | 0 (NaN) |  |
|  | AU | 21 (12.3) | 21 (12.3) | 0 (NaN) |  |
|  | NaU | 7 (4.1) | 7 (4.1) | 0 (NaN) |  |
|  | CaP(CO3) | 6 (3.5) | 6 (3.5) | 0 (NaN) |  |
|  | CA | 12 (7.0) | 12 (7.0) | 0 (NaN) |  |
|  | COM | 51 (29.8) | 51 (29.8) | 0 (NaN) |  |
|  | Others | 20(11.7) | 20(11.7) | 0 (NaN) |  |
